# Supplementary material for: Development of a High-throughput Agar Colony Formation Assay to Identify Drug Candidates against Medulloblastoma
Source: MDPI journal article supplement (doi:10.3390/ph13110368), 2020-11-05
Supplement: s1 [file s1]

# Development of a high-throughput agar colony formation assay to identify drug candidates against medulloblastoma

Mohammed Sedeeq, Ahmed Maklad, Nuri Gueven, Iman Azimi

## Supplementary material

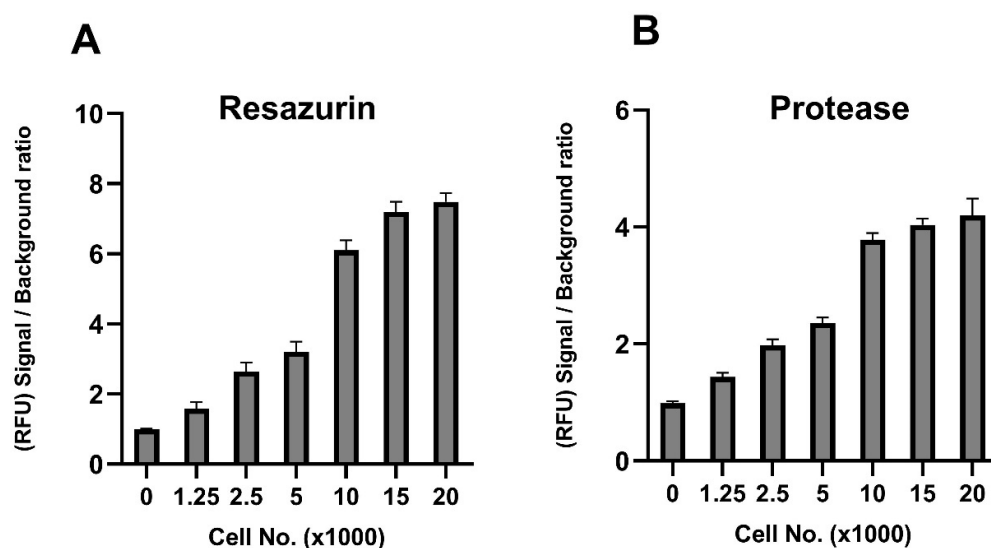

**Figure S1. Optimisation of cell density.** Cell densities of up to 20, 000 cell/well of the D341 cell line were tested. Data represents quantitative relative fluorescence levels of (A) resazurin, and (B) GF-AFC substrate from cells seeded at six different densities and cultured for 7 days.

## Resazurin Assay

**A**

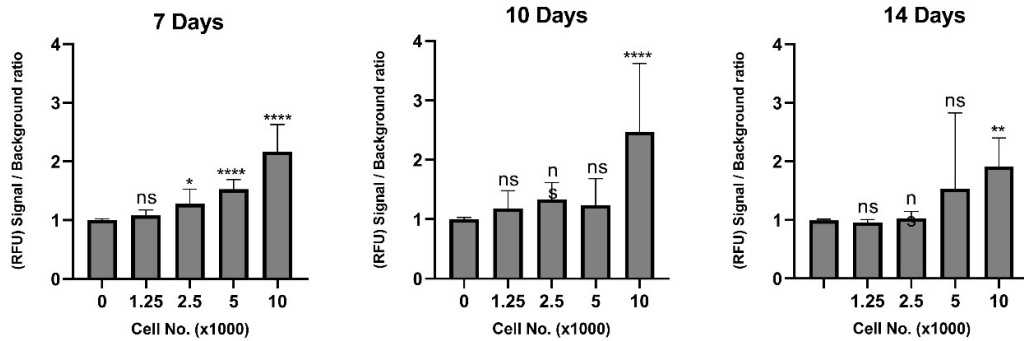

**B**

## Protease Assay

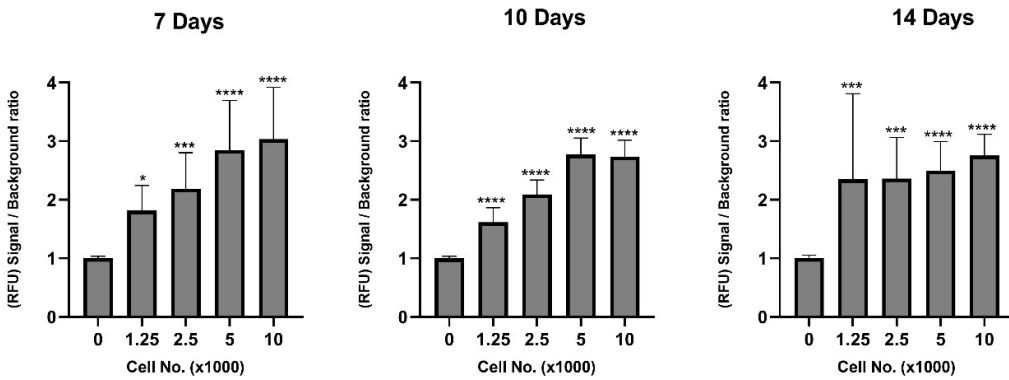

**Figure S2. Optimisation of cell density and culture time.** Data represent quantitative relative fluorescence level of (A) resazurin, and (B) GF-AFC substrates from D283 group-3 MB cells seeded at four different densities and cultured for 7, 10 and 14 days. Data are expressed as mean  $\pm$  standard deviation from three independent experiments with four replicates each. ns = not significant ( $p > 0.05$ ), \*\*\* $p < 0.001$ , \*\*\*\* $p < 0.0001$  (one-way ANOVA with Dunnett multiple comparisons test compared with the 1250 cells group).

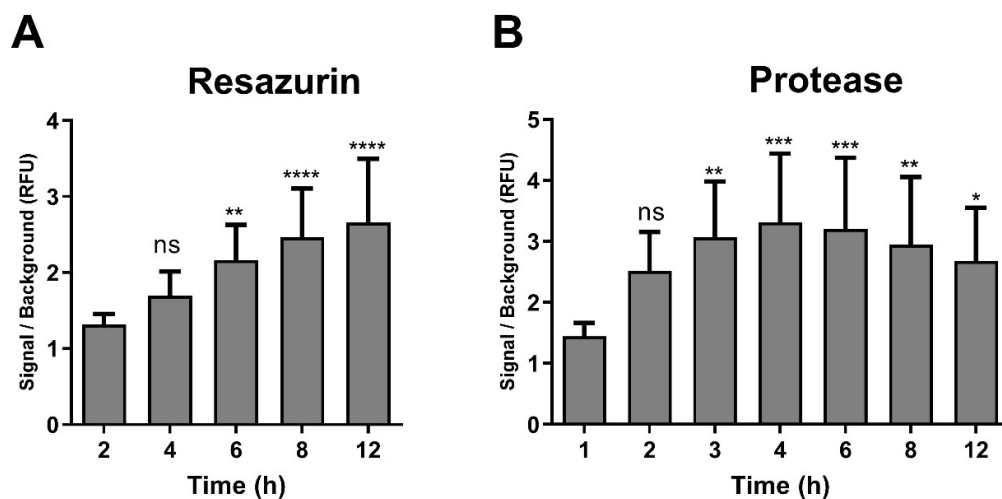

**Figure S3. Optimisation of exposure time.** D283 cells were incubated with (A) resazurin, or (B) GF-AFC substrates and analysed at different time points. Data are expressed as mean  $\pm$  standard deviation from three assays with four replicates each. ns = not significant ( $p > 0.05$ ), \* $p < 0.05$ , \*\* $p < 0.01$ , \*\*\* $p < 0.001$ , \*\*\*\* $p < 0.0001$  (one-way ANOVA with Dunnett multiple comparisons test compared with the first timepoint group).

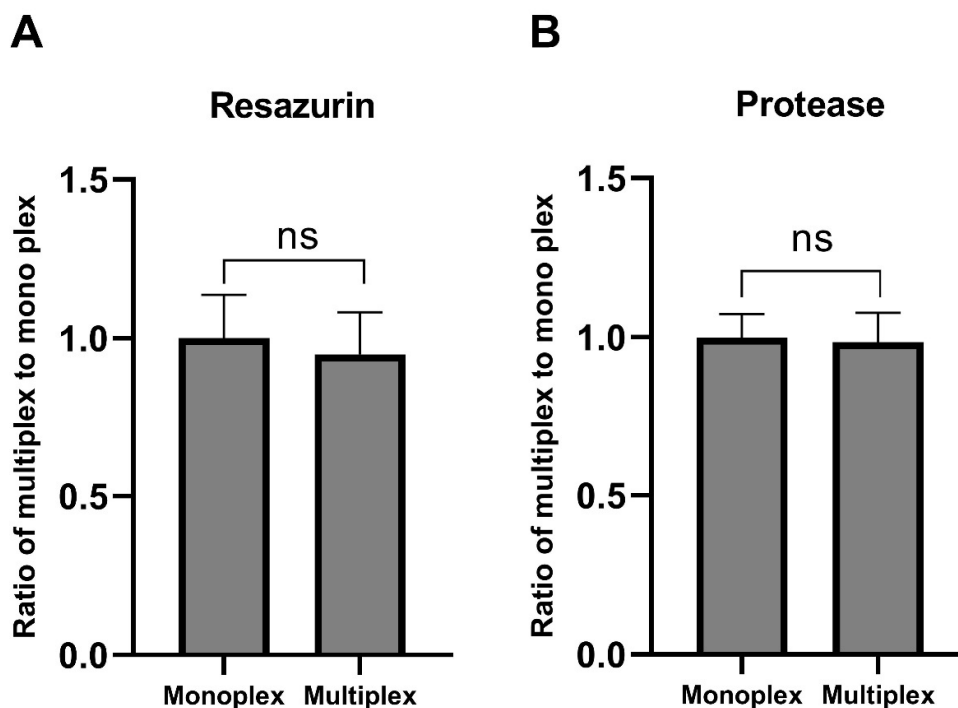

**Figure S4. Multiplexing resazurin and protease assays.** For monoplex detection, D283 cells were incubated with resazurin (6 h) or GF-AFC (3 h) alone. For multiplex detection, cells were incubated with resazurin for 3 h followed by GF-AFC for another 3 h. Plates were analysed for the (A) resorufin signal at 560/590 nm excitation/emission and for the (B) GF-AFC signal at excitation/emission wavelength of 380/505 nm. Data are expressed as mean  $\pm$  standard deviation from three independent assays with four replicates each. ns = not significant, ( $p > 0.05$ ), t-test with two-tailed comparison.

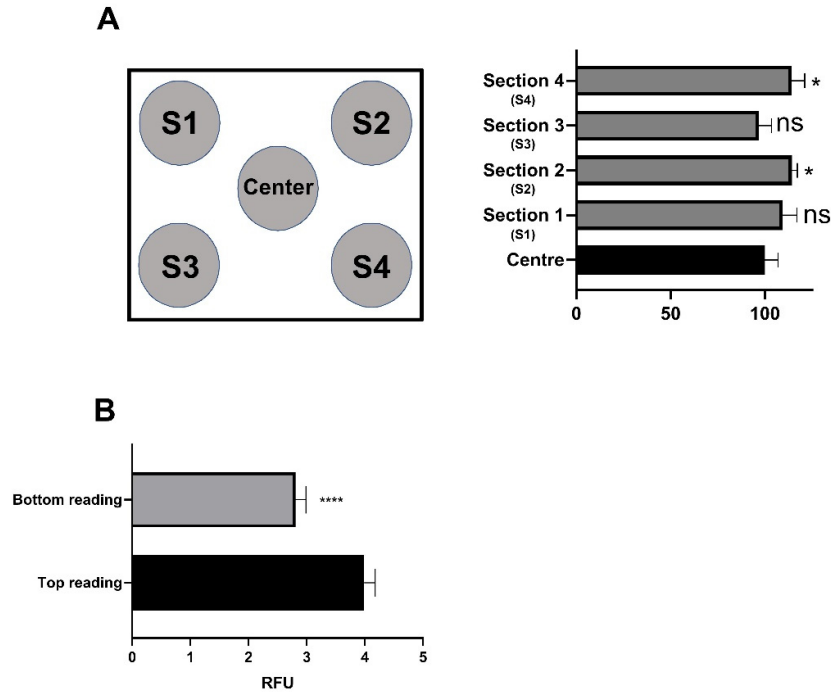

**Figure S5. Signal distribution across a well using GF-AFC substrate in D341 MB cells.**

Data are expressed as mean  $\pm$  standard deviation from three independent assays with four replicates each. (A) Measurements taken from different sections within one Z-position inside a single well (multiple read, 2 X 2 with 250  $\mu$ m distance from border of the read regions) using Tecan Spark 20M Multimode Microplate Reader, one-way ANOVA with Dunnett multiple comparisons test compared to reading from the center: ns = not significant ( $p > 0.05$ ),  $*p < 0.05$  (B) Top versus bottom reading, with two-tailed comparison test compared to reading from bottom side of the well:  $****p < 0.0001$ .
